# Supplementary material
Source: PubMed Central journal article supplement (PMC3504626)
Supplement: NIHMS397211-supplement-01.pdf [file NIHMS397211-supplement-01.pdf]

## A Critical Review of Magnetic Resonance Spectroscopy Studies of Obsessive-Compulsive Disorder

### Supplemental Information

**Table S1.** Proton Magnetic Resonance Spectroscopy Studies Reporting Neurochemical Differences Between OCD Patients and Healthy Controls

| Authors                             | Subjects                                               | Comorbidities                                                                                                                                                | Medication Status                                                                                         | Field Strength | MRS Sequence*        | Voxel Size                                            | Tissue Segmentation | Region(s) of Interest                                                                    | Neurochemicals Examined            | Quantification Method          | Reported Results                                                                                                              |
|-------------------------------------|--------------------------------------------------------|--------------------------------------------------------------------------------------------------------------------------------------------------------------|-----------------------------------------------------------------------------------------------------------|----------------|----------------------|-------------------------------------------------------|---------------------|------------------------------------------------------------------------------------------|------------------------------------|--------------------------------|-------------------------------------------------------------------------------------------------------------------------------|
| Ebert <i>et al.</i> (1997) (1)      | 12 OCD, 6 HC                                           | SCZ and schizoaffective disorder excluded                                                                                                                    | 10 med free > 6 months; 2 receiving stable dose of CMP or fluvoxamine                                     | 2 T            | PRESS                | 2 X 2 X 2 cm                                          | No                  | ACC; right striatum (caudate + putamen); right POC                                       | tNAA, Glx, tCr, tCho, ml           | tCr ratio                      | decreased tNAA/tCr in right striatum in OCD; decreased tNAA/tCr in ACC correlated with severity of illness                    |
| Bartha <i>et al.</i> (1998) (2)     | 13 OCD, 13 HC                                          | 1 OCD subject with MDD; 12 with pure OCD                                                                                                                     | All med free > 6 weeks                                                                                    | 4 T            | STEAM                | 1.5 X 2 X 1.5 cm                                      | Yes                 | left corpus striatum (caudate + putamen)                                                 | tNAA, Glu, Gln, taurine, tCho, tCr | arbitrary units                | decreased tNAA in left corpus striatum in OCD                                                                                 |
| Ohara <i>et al.</i> (1999) (3)      | 12 OCD, 12 HC                                          | current MDD excluded                                                                                                                                         | 2 med naïve; 10 receiving stable dose of CMP or haloperidol                                               | 1.5 T          | PRESS                | 2 X 2 X 2 cm                                          | No                  | bilateral lenticular nuclei (contained lenticular nuclei, insula, caudate, and thalamus) | tNAA, tCr, tCho                    | tCr and tCho ratios            | no significant differences were found in tNAA/tCr, tNAA/tCho, and tCho/tCr between OCD and HCs                                |
| Fitzgerald <i>et al.</i> (2000) (4) | 11 pediatric OCD, 11 HC                                | 5 OCD subjects with comorbid anxiety disorders; 6 subjects with pure OCD; many with subthreshold depression                                                  | All med naïve                                                                                             | 1.5 T          | multislice spin-echo | 7.5 x 7.5 x 15 mm                                     | No                  | right and left medial and lateral thalami                                                | tNAA, tCr, tCho                    | tCr, tCho, and tCr+tCho ratios | decreased tNAA/tCho and tNAA/tCr in left and right medial thalami in OCD                                                      |
| Rosenberg <i>et al.</i> (2001) (5)  | 11 pediatric OCD, 11 HC                                | 5 OCD subjects with comorbid anxiety disorders; 6 subjects with pure OCD; many with subthreshold depression                                                  | All med naïve                                                                                             | 1.5 T          | multislice spin-echo | 7.5 x 7.5 x 15 mm                                     | No                  | right and left medial and lateral thalami                                                | tNAA, tCr, tCho                    | absolute concentrations (mmol) | increased left and right medial thalamic tCho in OCD compared to HC                                                           |
| Russell <i>et al.</i> (2003) (6)    | 15 pediatric OCD, 15 HC                                | lifetime history of psychosis, bipolar disorder, MDD, PTSD, conduct disorder, Tourette's syndrome, eating disorders, and substance abuse/dependence excluded | All med naïve                                                                                             | 1.5 T          | multislice spin-echo | 7.5 x 7.5 x 15 mm                                     | Yes                 | right and left DLPFC                                                                     | tNAA, tCr, tCho                    | absolute concentrations (mmol) | increased tNAA in left, but not right, DLPFC in OCD compared to HC                                                            |
| Smith <i>et al.</i> (2003) (7)      | 27 pediatric OCD, 18 pediatric MDD, 18 HC              | 6 OCD subjects had comorbid anxiety disorders; 1 had dysthymia and comorbid anxiety disorder; 2 had ODD; 18 with pure OCD                                    | All med naïve                                                                                             | 1.5 T          | multislice spin-echo | 7.5 x 7.5 x 15 mm                                     | No                  | right and left medial and lateral thalami                                                | tNAA, tCr, tCho                    | absolute concentrations (mmol) | increased left and right medial thalamic tCho in OCD compared to MDD and HC                                                   |
| Rosenberg <i>et al.</i> (2004) (8)  | 20 pediatric nondepressed OCD, 14 pediatric MDD, 14 HC | 2 OCD subjects had comorbid anxiety disorders; 1 had ADD; 1 had ODD; 1 had dysthymia; 15 had pure OCD                                                        | All med naïve                                                                                             | 1.5 T          | PRESS                | 2 x 1.5 x 1 cm                                        | No                  | ACC                                                                                      | tNAA, Glx, tCr, tCho, ml           | absolute concentrations (mmol) | decreased Glx in ACC in OCD and MDD; No differences in ACC Glx between OCD and MDD                                            |
| Kitamura <i>et al.</i> (2006) (9)   | 12 OCD, 32 HC                                          | any history of psychosis, depressive disorders, bipolar disorder, SCZ, PTSD, eating disorders, ADHD, PDD excluded                                            | 2 med free; 10 receiving stable dose of SSRI or CMP                                                       | 3 T            | PRESS                | 15 mm <sup>3</sup> ; 15 x 20 x 15 mm; 15 x 30 x 15 mm | No                  | ACC; basal ganglia; thalamus; frontal and parietal white matter                          | tNAA, tCr, tCho                    | tCr ratio                      | increased tCho/tCr in parietal white matter in OCD; parietal tCho/tCr correlated with OCD severity                            |
| Whiteside <i>et al.</i> (2006) (10) | 15 OCD, 15 HC                                          | current MDD, bipolar disorder, or SCZ excluded                                                                                                               | 7 med free; 8 receiving stable dose of either SSRI, CMP, mirtazapine, bupropion, trazodone, or clonazepam | 1.5 T          | PRESS                | 2 x 2 x 1 cm                                          | No                  | left and right caudate head; left and right OFC                                          | tNAA, Glx, tCr, tCho, ml           | tCr ratio                      | increased Glx/tCr and tNAA/tCr in the right OFC; decreased ml/tCr in caudate head bilaterally                                 |
| Mirza <i>et al.</i> (2006) (11)     | 27 pediatric OCD, 18 pediatric MDD, 18 HC              | 6 OCD subjects had comorbid anxiety disorders; 1 had dysthymia and comorbid anxiety disorder; 2 had ODD; 18 with pure OCD                                    | All med naïve                                                                                             | 1.5 T          | multislice spin-echo | 7.5 x 7.5 x 15 mm                                     | No                  | right and left medial and lateral thalami                                                | tNAA, tCr, tCho                    | absolute concentrations (mmol) | increased left and right medial thalamic tCr in OCD compared to MDD and HC                                                    |
| Mohamed <i>et al.</i> (2007) (12)   | 10 OCD, 10 HC                                          | 1 OCD subject with GAD; 9 had pure OCD                                                                                                                       | All receiving stable dose of SSRI                                                                         | 1.5 T          | multislice spin-echo | 15 x 8.6 x 8.6 mm                                     | No                  | right and left thalamus; right and left basal ganglia                                    | tNAA, tCr, tCho                    | tCr and tCho ratios            | decreased tNAA/tCr in right basal ganglia in SSRI non-responders; increased tCho/tCr in right thalamus in SSRI non-responders |
| Sumitani <i>et al.</i> (2007) (13)  | 20 OCD, 26 HC                                          | all Axis I disorders, other than OCD, excluded                                                                                                               | 8 med naïve or med free; 8 receiving SSRI; 4 receiving SSRI + antipsychotic                               | 1.5 T          | STEAM                | 1.7 x 1.7 x 1.5 cm                                    | Yes                 | bilateral ACC; left basal ganglia (caudate + putamen); left frontal lobe                 | tNAA, tCr, tCho                    | absolute concentrations        | decreased tNAA in ACC in responders to SSRI + antipsychotic versus HC                                                         |

Table S1. (continued)

| Authors                             | Subjects                                                                      | Comorbidities                                                                                                                         | Medication Status                                                                  | Field Strength | MRS Sequence <sup>a</sup> | Voxel Size                                                            | Tissue Segmentation | Region(s) of Interest                                                                | Neurochemicals Examined       | Quantification Method                                  | Reported Results                                                                                                                                                                                                                                                                  |
|-------------------------------------|-------------------------------------------------------------------------------|---------------------------------------------------------------------------------------------------------------------------------------|------------------------------------------------------------------------------------|----------------|---------------------------|-----------------------------------------------------------------------|---------------------|--------------------------------------------------------------------------------------|-------------------------------|--------------------------------------------------------|-----------------------------------------------------------------------------------------------------------------------------------------------------------------------------------------------------------------------------------------------------------------------------------|
| Yücel <i>et al.</i> (2007) (14)     | 19 OCD, 19 HC                                                                 | all Axis I disorders, other than OCD, excluded                                                                                        | 8 med free, 11 receiving stable dose of SSRI, CMP, or venlafaxine                  | 3 T            | PRESS                     | 6.5 cm <sup>3</sup>                                                   | Yes                 | dorsal ACC                                                                           | tNAA, Glx, tCr, tCho, ml      | absolute concentrations (i.u.)                         | decreased tNAA in dorsal ACC in OCD vs. HC                                                                                                                                                                                                                                        |
| Yücel <i>et al.</i> (2008) (15)     | 20 OCD, 26 HC                                                                 | all Axis I disorders, other than OCD, excluded                                                                                        | 8 med free; 12 receiving stable dose of SSRI, CMP, or venlafaxine                  | 3 T            | PRESS                     | 6.5 cm <sup>3</sup>                                                   | Yes                 | right and left dorsal ACC; right and left rostral ACC                                | tNAA, Glx, tCr, tCho, ml      | absolute concentrations (i.u.)                         | decreased Glx in right and left rostral ACC and left dorsal ACC in female OCD patients; Glx correlated with symptom severity in female OCD patients; increased ml in right rostral and dorsal ACC in male and female OCD patients                                                 |
| Starck <i>et al.</i> (2008) (16)    | 9 OCD, 16 HC                                                                  | several OCD subjects with mild depression or dysthymia; 1 OCD subject with GAD                                                        | 1 med naïve; 5 receiving SSRI; 1 receiving CMP + quetiapine; 2 receiving hypnotics | 1.5 T          | PRESS                     | 1.5 cm <sup>3</sup> ;<br>3.6 cm <sup>3</sup> ;<br>4.0 cm <sup>3</sup> | No                  | right caudate (head + body); bilateral ACC; OCC                                      | tNAA, Glu, Glx, tCho, ml, tCr | absolute concentrations (i.u.)                         | no significant differences in metabolites between OCD and HC; OCD symptom severity positively correlated with caudate tCr, Glx, Glu, and tCho as well as OCC ml; OCD symptom severity negatively correlated with OCC Glx                                                          |
| Atmaca <i>et al.</i> (2009) (17)    | 18 OCD, 18 HC                                                                 | all current or past psychiatric disorders were excluded                                                                               | All med free > 2 weeks                                                             | 1.5 T          | unclear from manuscript   | 10 x 10 x 2.4 mm                                                      | No                  | left and right hippocampus                                                           | tNAA, tCr, tCho               | tCr and tCho ratios and absolute concentrations (mmol) | decreased tNAA/tCr, tNAA/tCho, and absolute tNAA in hippocampus in OCD versus HC; increased absolute tCho in hippocampus in OCD versus HC                                                                                                                                         |
| Arnold <i>et al.</i> (2009) (18)**  | 16 pediatric OCD                                                              | lifetime history of psychosis, bipolar disorder, conduct disorder, Tourette's syndrome, and eating disorders excluded                 | All med naïve                                                                      | 1.5 T          | PRESS                     | 2 X 1.5 X 1 cm; 2 X 2 X 2 cm                                          | No                  | ACC; POC                                                                             | tNAA, Glx, tCr, tCho, ml      | absolute concentrations (mmol)                         | decreased Glx in ACC, but not POC, was associated with the rs1019385 polymorphism of the <i>GRIN2B</i> gene                                                                                                                                                                       |
| Fan <i>et al.</i> (2010) (19)       | 21 OCD, 19 HC                                                                 | all comorbid psychiatric disorders were excluded                                                                                      | 10 med naïve; 11 med free > 8 weeks                                                | 1.5 T          | PRESS                     | 2 x 2 x 2 cm                                                          | No                  | medial prefrontal cortex                                                             | tNAA, tCr, tCho, ml           | tCr ratio                                              | increased tNAA/Cr in medial prefrontal cortex in OCD versus HC                                                                                                                                                                                                                    |
| Bédard and Chantal (2011) (20)      | 13 OCD, 12 HC                                                                 | all active (for at least 6 months prior to enrollment) Axis I disorders, except OCD, were excluded                                    | 2 med free; 11 receiving stable dose of SSRI, CMP, or venlafaxine > 3 months       | 1.5 T          | PRESS                     | 8.0 cm <sup>3</sup> to 9.6 cm <sup>3</sup>                            | No                  | left and right OFC; left and right median temporal lobe; left and right thalami; ACC | tNAA, Glx, tCr, tCho, ml      | tCr ratio                                              | no significant differences in metabolites between OCD and HC in any ROIs; significant negative correlation between OCD symptom severity and ml/tCr in left orbitofrontal cortex                                                                                                   |
| Besiroglu <i>et al.</i> (2011) (21) | 30 OCD (15 with autogenous obsessions and 15 with reactive obsessions), 15 HC | current MDD, psychosis, bipolar disorder excluded; comorbid anxiety disorders were permitted as long as OCD was the primary diagnosis | All med free                                                                       | 1.5 T          | PRESS                     | 2 x 2 x 2 cm; 1.6 x 1.6 x 1.6 cm                                      | No                  | right rostral ACC; right amygdala-hippocampal region                                 | tNAA, tCr, tCho               | tCr ratio and absolute concentrations (mmol)           | decreased tNAA/tCr in right rostral ACC in OCD versus HC, which were more likely due to increased absolute tCr in ACC in OCD; increased tNAA/tCr in right amygdala-hippocampal region in OCD with autogenous obsessions, which was more likely explained by increased tNAA levels |

ACC, anterior cingulate cortex; ADD, attention deficit disorder; ADHD, attention-deficit/hyperactivity disorder; CMP, clomipramine; DLPFC, dorsolateral prefrontal cortex; GAD, generalized anxiety disorder; Gln, glutamine; Glu, glutamate; Glx, glutamate plus glutamine; HC, healthy controls; i.u., institutional units; MDD, major depressive disorder; ml, myo-inositol; MRS, magnetic resonance spectroscopy; OCD, obsessive-compulsive disorder; OCC, occipital cortex; OFC, orbitofrontal cortex; PDD, pervasive developmental disorder; POC, parieto-occipital cortex; PRESS, point-resolved spectroscopy; PTSD, posttraumatic stress disorder; SCZ, schizophrenia; SSRI, selective serotonin reuptake inhibitor; STEAM, stimulated echo acquisition mode; T, Tesla; tCho, total choline; tCr, total creatine; tNAA, total *N*-acetylaspartate.

<sup>a</sup>Multislice spin-echo refers to multi-voxel, 2-dimensional chemical-shift imaging with multi-slice selection. Stated voxel dimensions with multislice spin-echo refer to nominal voxel size (FOV/sampling matrix). PRESS, STEAM and PROBE-P are all single-voxel acquisitions.

\*\*This study did not include a healthy comparison group.

**Table S2.** Proton Magnetic Resonance Spectroscopy Studies Reporting Neurochemical Changes with Treatment in OCD Patients

| Authors                             | Subjects                                | Comorbidities                                                                                                                                                                          | Treatment Administered                 | Field Strength | MRS Sequence <sup>a</sup>     | Voxel Size                                                  | Tissue Segmentation | ROI(s)                                                                                    | Metabolites Examined     | Quantification Method                                         | Reported Results                                                                                                                                                                                                               |
|-------------------------------------|-----------------------------------------|----------------------------------------------------------------------------------------------------------------------------------------------------------------------------------------|----------------------------------------|----------------|-------------------------------|-------------------------------------------------------------|---------------------|-------------------------------------------------------------------------------------------|--------------------------|---------------------------------------------------------------|--------------------------------------------------------------------------------------------------------------------------------------------------------------------------------------------------------------------------------|
| Moore <i>et al.</i> (1998) (22)     | 1 pediatric OCD                         | none                                                                                                                                                                                   | paroxetine                             | 1.5 T          | PRESS                         | 0.7 cm <sup>3</sup>                                         | No                  | head of left caudate                                                                      | tNAA, Glx, tCr, tCho, ml | ratio to brain water concentration (x 10 <sup>3</sup> /water) | decreased Glx in head of left caudate after 12 weeks of paroxetine treatment                                                                                                                                                   |
| Rosenberg <i>et al.</i> (2000) (23) | 11 pediatric med-naïve OCD, 11 HC       | lifetime history of psychosis, bipolar disorder, MDD, eating disorders, substance abuse/dependence, Tourette's disease, ADHD, conduct disorder, or autistic spectrum disorder excluded | paroxetine                             | 1.5 T          | PRESS                         | 0.7 cm <sup>3</sup>                                         | No                  | head of left caudate                                                                      | tNAA, Glx, tCr, tCho, ml | ratio to brain water concentration (x 10 <sup>4</sup> /water) | increased pre-treatment Glx in head of left caudate in OCD vs. HC; significant decrease in Glx in left head of caudate after 12 weeks of paroxetine treatment in OCD                                                           |
| Bolton <i>et al.</i> (2001) (24)    | 1 pediatric OCD                         | none                                                                                                                                                                                   | paroxetine                             | 1.5 T          | PRESS                         | 0.7 cm <sup>3</sup>                                         | No                  | head of left caudate                                                                      | tNAA, Glx, tCr, tCho, ml | ratio to brain water concentration (x 10 <sup>3</sup> /water) | decreased Glx in head of left caudate after 12 weeks of paroxetine treatment that persisted 3 months after medication discontinuation                                                                                          |
| Benazon <i>et al.</i> (2003) (25)   | 21 pediatric, treatment-naïve OCD       | lifetime history of psychosis, bipolar disorder, MDD, eating disorders, substance abuse/dependence, Tourette's disease, ADHD, conduct disorder, or autistic spectrum disorder excluded | CBT                                    | 1.5 T          | PRESS                         | 0.7 cm <sup>3</sup>                                         | No                  | head of the left caudate                                                                  | tNAA, Glx, tCr, tCho, ml | ratio to brain water concentration (x 10 <sup>3</sup> /water) | no significant changes in left caudate head in OCD after 12 weeks of CBT despite clinical improvement                                                                                                                          |
| Jang <i>et al.</i> (2006) (26)      | 13 med-naïve OCD, 13 HC                 | lifetime history of psychosis, bipolar disorder, substance abuse/dependence, Tourette's disease excluded                                                                               | citalopram                             | 1.5 T          | <sup>1</sup> H-MRSI PRESS     | 20 mm thick slab with voxel dimensions of 7.5 x 7.5 x 20 mm | Yes                 | prefrontal cortex, parietal cortex, ACC, PCC, frontal white matter, parietal white matter | tNAA                     | tCr and tCho ratios                                           | decreased pretreatment tNAA/tCr in prefrontal cortex, frontal white matter and ACC in OCD vs. HC; significantly increased tNAA/tCr in prefrontal cortex and frontal white matter after 12 weeks of citalopram treatment in OCD |
| O'Neill <i>et al.</i> (2012) (27)   | 5 med-free pediatric OCD; 9 HC          | authors do not report any exclusion criteria for comorbid Axis I disorders                                                                                                             | CBT                                    | 1.5 T          | <sup>1</sup> H-MRSI PRESS     | 9 mm thick slab x 2                                         | Yes                 | bilateral putamen, thalamus, and rostral ACC                                              | tNAA, Glx, tCr, tCho, ml | absolute concentrations (i.u.)                                | increased pre-treatment tNAA in left rostral ACC in OCD vs. HC; tNAA and tCr in left rostral ACC significantly decreased and tCho in right thalamus significantly increased after 12 weeks of CBT                              |
| Lázaro <i>et al.</i> (2012) (28)    | 11 treatment-naïve pediatric OCD, 12 HC | all comorbid psychiatric and neurological disorders excluded                                                                                                                           | naturalistic treatment with SSRI + CBT | 1.5 T          | PRESS                         | 2 x 3 x 2 cm; 2 x 2 x 2 cm                                  | Yes                 | ACC/medial frontal lobe, left and right striatum                                          | tNAA, Glx, tCr, tCho, ml | absolute concentrations (i.u.)                                | decreased pre-treatment tCho in left striatum in OCD vs. HC; No significant changes following 6 months of SSRI + CBT                                                                                                           |
| Whiteside <i>et al.</i> (2012) (29) | 15 adult OCD, 15 HC                     | exclusions included: lifetime history of SCZ, bipolar disorder, mental retardation, substance abuse or current MDD                                                                     | CBT                                    | 1.5 T          | single-voxel short TE PROBE-P | 2 x 2 x 1 cm                                                | Yes                 | left and right caudate head; left and right OFC                                           | tNAA, Glx, tCr, tCho, ml | absolute concentrations (i.u.)                                | decreased pre-treatment tNAA in caudate and decreased tNAA and tCr in right OFC in OCD vs. HC; Significantly increased tNAA in left caudate head after 12 weeks of CBT                                                         |

<sup>1</sup>H-MRSI, proton magnetic resonance spectroscopy imaging; ACC, anterior cingulate cortex; ADHD, attention-deficit/hyperactivity disorder; CBT, cognitive behavioral therapy; Glx, glutamate plus glutamine; HC, healthy controls; i.u., institutional units; MDD, major depressive disorder; ml, myo-inositol; OCD, obsessive-compulsive disorder; OFC, orbitofrontal cortex; PRESS, point-resolved spectroscopy; PROBE-P, proton brain examination; ROI, region of interest; SCZ, schizophrenia; SSRI, selective serotonin reuptake inhibitor; T, Tesla; tCho, total choline; tCr, total creatine; tNAA, total *N*-acetylaspartate.

<sup>1</sup>H-MRSI PRESS refers to multi-voxel, 2-dimensional chemical-shift imaging with PRESS volume excitation. Stated voxel dimensions with <sup>1</sup>H-MRSI PRESS refer to nominal voxel size (FOV/sampling matrix). PRESS and PROBE-P are single-voxel acquisitions.

## Supplemental References

1. Ebert D, Speck O, Konig A, Berger M, Hennig J, Hohagen F (1997): 1H-magnetic resonance spectroscopy in obsessive-compulsive disorder: evidence for neuronal loss in the cingulate gyrus and the right striatum. *Psychiatry Res.* 74:173-176.
2. Bartha R, Stein MB, Williamson PC, Drost DJ, Neufeld RW, Carr TJ, *et al.* (1998): A short echo 1H spectroscopy and volumetric MRI study of the corpus striatum in patients with obsessive-compulsive disorder and comparison subjects. *Am J Psychiatry.* 155:1584-1591.
3. Ohara K, Isoda H, Suzuki Y, Takehara Y, Ochiai M, Takeda H, *et al.* (1999): Proton magnetic resonance spectroscopy of lenticular nuclei in obsessive-compulsive disorder. *Psychiatry Res.* 92:83-91.
4. Fitzgerald KD, Moore GJ, Paulson LA, Stewart CM, Rosenberg DR (2000): Proton spectroscopic imaging of the thalamus in treatment-naive pediatric obsessive-compulsive disorder. *Biol Psychiatry.* 47:174-182.
5. Rosenberg DR, Amponsah A, Sullivan A, MacMillan S, Moore GJ (2001): Increased medial thalamic choline in pediatric obsessive-compulsive disorder as detected by quantitative in vivo spectroscopic imaging. *J Child Neurol.* 16:636-641.
6. Russell A, Cortese B, Lorch E, Ivey J, Banerjee SP, Moore GJ, *et al.* (2003): Localized functional neurochemical marker abnormalities in dorsolateral prefrontal cortex in pediatric obsessive-compulsive disorder. *J Child Adolesc Psychopharmacol.* 13 Suppl 1:S31-38.
7. Smith EA, Russell A, Lorch E, Banerjee SP, Rose M, Ivey J, *et al.* (2003): Increased medial thalamic choline found in pediatric patients with obsessive-compulsive disorder versus major depression or healthy control subjects: a magnetic resonance spectroscopy study. *Biol Psychiatry.* 54:1399-1405.
8. Rosenberg DR, Mirza Y, Russell A, Tang J, Smith JM, Banerjee SP, *et al.* (2004): Reduced anterior cingulate glutamatergic concentrations in childhood OCD and major depression versus healthy controls. *J Am Acad Child Adolesc Psychiatry.* 43:1146-1153.
9. Kitamura H, Shioiri T, Kimura T, Ohkubo M, Nakada T, Someya T (2006): Parietal white matter abnormalities in obsessive-compulsive disorder: a magnetic resonance spectroscopy study at 3-Tesla. *Acta Psychiatr Scand.* 114:101-108.
10. Whiteside SP, Port JD, Deacon BJ, Abramowitz JS (2006): A magnetic resonance spectroscopy investigation of obsessive-compulsive disorder and anxiety. *Psychiatry Res.* 146:137-147.
11. Mirza Y, O'Neill J, Smith EA, Russell A, Smith JM, Banerjee SP, *et al.* (2006): Increased medial thalamic creatine-phosphocreatine found by proton magnetic resonance spectroscopy in children with obsessive-compulsive disorder versus major depression and healthy controls. *J Child Neurol.* 21:106-111.
12. Mohamed MA, Smith MA, Schlund MW, Nestadt G, Barker PB, Hoehn-Saric R (2007): Proton magnetic resonance spectroscopy in obsessive-compulsive disorder: a pilot investigation comparing treatment responders and non-responders. *Psychiatry Res.* 156:175-179.
13. Sumitani S, Harada M, Kubo H, Ohmori T (2007): Proton magnetic resonance spectroscopy reveals an abnormality in the anterior cingulate of a subgroup of obsessive-compulsive disorder patients. *Psychiatry Res.* 154:85-92.
14. Yücel M, Harrison BJ, Wood SJ, Fornito A, Wellard RM, Pujol J, *et al.* (2007): Functional and biochemical alterations of the medial frontal cortex in obsessive-compulsive disorder. *Arch Gen Psychiatry.* 64:946-955.
15. Yücel M, Wood SJ, Wellard RM, Harrison BJ, Fornito A, Pujol J, *et al.* (2008): Anterior cingulate glutamate-glutamine levels predict symptom severity in women with obsessive-compulsive disorder. *Aust N Z J Psychiatry.* 42:467-477.
16. Starck G, Ljungberg M, Nilsson M, Jonsson L, Lundberg S, Ivarsson T, *et al.* (2008): A 1H magnetic resonance spectroscopy study in adults with obsessive compulsive disorder: relationship between metabolite concentrations and symptom severity. *J Neural Transm.* 115:1051-1062.
17. Atmaca M, Yildirim H, Ozdemir H, Koc M, Ozler S, Tezcan E (2009): Neurochemistry of the hippocampus in patients with obsessive-compulsive disorder. *Psychiatry Clin Neurosci.* 63:486-490.
18. Arnold PD, Macmaster FP, Richter MA, Hanna GL, Sicard T, Burroughs E, *et al.* (2009): Glutamate receptor gene (GRIN2B) associated with reduced anterior cingulate glutamatergic concentration in pediatric obsessive-compulsive disorder. *Psychiatry Res.* 172:136-139.
19. Fan Q, Tan L, You C, Wang J, Ross CA, Wang X, *et al.* (2010) Increased N-Acetylaspartate/creatine ratio in the medial prefrontal cortex among unmedicated obsessive-compulsive disorder patients. *Psychiatry Clin Neurosci.* 64:483-490.
20. Bedard MJ, Chantal S (2011) Brain magnetic resonance spectroscopy in obsessive-compulsive disorder: the importance of considering subclinical symptoms of anxiety and depression. *Psychiatry Res.* 192:45-54.
21. Besiroglu L, Sozen M, Ozbebit O, Avcu S, Selvi Y, Bora A, *et al.* (2011) The involvement of distinct neural systems in patients with obsessive-compulsive disorder with autogenous and reactive obsessions. *Acta Psychiatr Scand.* 124:141-151.
22. Moore GJ, MacMaster FP, Stewart C, Rosenberg DR (1998): Case study: caudate glutamatergic changes with paroxetine therapy for pediatric obsessive-compulsive disorder. *J Am Acad Child Adolesc Psychiatry.* 37:663-667.

23. Rosenberg DR, MacMaster FP, Keshavan MS, Fitzgerald KD, Stewart CM, Moore GJ (2000): Decrease in caudate glutamatergic concentrations in pediatric obsessive-compulsive disorder patients taking paroxetine. *J Am Acad Child Adolesc Psychiatry.* 39:1096-1103.
24. Bolton J, Moore GJ, MacMillan S, Stewart CM, Rosenberg DR (2001): Case study: caudate glutamatergic changes with paroxetine persist after medication discontinuation in pediatric OCD. *J Am Acad Child Adolesc Psychiatry.* 40:903-906.
25. Benazon NR, Moore GJ, Rosenberg DR (2003): Neurochemical analyses in pediatric obsessive-compulsive disorder in patients treated with cognitive-behavioral therapy. *J Am Acad Child Adolesc Psychiatry.* 42:1279-1285.
26. Jang JH, Kwon JS, Jang DP, Moon WJ, Lee JM, Ha TH, *et al.* (2006): A proton MRSI study of brain N-acetylaspartate level after 12 weeks of citalopram treatment in drug-naive patients with obsessive-compulsive disorder. *Am J Psychiatry.* 163:1202-1207.
27. O'Neill J, Piacentini JC, Chang S, Levitt JG, Rozenman M, Bergman L, *et al.* (2012) MRSI correlates of cognitive-behavioral therapy in pediatric obsessive-compulsive disorder. *Prog Neuropsychopharmacol Biol Psychiatry.* 36:161-168.
28. Lázaro L, Bargallo N, Andres S, Falcon C, Morer A, Junque C, *et al.* (2012) Proton magnetic resonance spectroscopy in pediatric obsessive-compulsive disorder: Longitudinal study before and after treatment. *Psychiatry Res.* Jan 24 [Epub ahead of print].
29. Whiteside SP, Abramowitz JS, Port JD (2012) The effect of behavior therapy on caudate N-acetyl-l-aspartic acid in adults with obsessive-compulsive disorder. *Psychiatry Res.* Jan 25 [Epub ahead of print].
